# Supplementary material for: Multimetallic complexes of group 10 and 11 metals based on polydentate dithiocarbamate ligands
Source: Royal Society of Chemistry journal article supplement (doi:10.1039/c0dt01745k), 2011-01-01
Supplement: c0dt01745k.pdf [file c0dt01745k.pdf]

## **Multimetallic complexes of group 10 and 11 metals based on polydentate dithiocarbamate ligands.**

**Katie Oliver, Andrew J. P. White, Graeme Hogarth and James D. E. T. Wilton-Ely\***

### *Supporting Information — X-Ray Crystallography*

#### **The X-ray crystal structure of 2**

The C(12)-, C(55)- and C(62)-based phenyl rings in the structure of **2** were found to be disordered. Two partial occupancy orientations were identified in each case, with occupancies of *ca.* 83:17, 65:35 and 70:30% for the C(12)-, C(55)- and C(62)-based phenyl rings respectively. Their geometries were optimised and the non-hydrogen atoms of the major occupancy orientations were refined anisotropically, whilst those of the minor occupancy orientations were refined isotropically. The included dichloromethane solvent molecule was found to be severely disordered. Five partial occupancy orientations were identified of *ca.* 35:32:14:10:9% occupancy, all of which were refined isotropically.

#### **The X-ray crystal structure of 3**

The C(19)- and C(26)-based phenyl rings in the structure of **3** were found to be disordered. Two partial occupancy orientations were identified in each case, with occupancies of *ca.* 84:16 and 65:35% for the C(19)- and C(26)-based phenyl rings respectively. Their geometries were optimised and the non-hydrogen atoms of the major occupancy orientations were refined anisotropically, whilst those of the minor occupancy orientations were refined isotropically. The P(20)-based hexafluorophosphate anion was found to be disordered. Two partial occupancy orientations were identified of *ca.* 89 and 11% occupancy, their geometries were optimised, and the atoms of the major occupancy orientation were refined anisotropically, whilst those of the minor occupancy orientation were refined isotropically. The included dichloromethane and ethanol solvent molecules were found to be disordered, and in each case three partial occupancy orientations were identified, with occupancies of *ca.* 45:42:13% for the dichloromethane, and *ca.* 54:32:14% for the ethanol. The non-hydrogen atoms of the 54% occupancy ethanol molecule were refined anisotropically, whilst all the others were refined isotropically. The O–H protons of the three

ethanol orientations could not be located, and so the atom list for the asymmetric unit is low by one hydrogen atom.

### The X-ray crystal structure of 6

The included dichloromethane solvent molecule in the structure of **6** was found to be disordered. Two partial occupancy orientations were identified of *ca.* 88 and 12% occupancy, and the atoms of the major occupancy orientation were refined anisotropically, whilst those of the minor occupancy orientation were refined isotropically. On the basis of the thermal parameters, the included ethanol molecule was determined to be *ca.* 25% occupancy in the asymmetric unit. The O–H proton of this 25% occupancy ethanol molecule could not be located, and so the atom list for the asymmetric unit is low by H<sub>0.25</sub>.

### The X-ray crystal structure of 7

The AuPMe<sub>3</sub> unit in the structure of **7** was found to be disordered. In the major occupancy orientation (*ca.* 96%) the unit is bound to S(1), as shown in Fig. S4. In the minor occupancy orientation (*ca.* 4%) it is bound to S(3), as shown in Fig. S5. The atoms of the major occupancy orientation were refined anisotropically, whilst those of the minor occupancy orientation were refined isotropically.

## Tables

**Table 1.** Selected bond lengths (Å) and angles (°) for **2**.

|                 |            |                  |            |
|-----------------|------------|------------------|------------|
| Ni(1)–S(1)      | 2.2143(7)  | Ni(1)–S(3)       | 2.2162(7)  |
| Ni(1)–P(25)     | 2.2119(7)  | Ni(1)–P(48)      | 2.2070(7)  |
| Ni(2)–S(9)      | 2.2230(7)  | Ni(2)–S(10)      | 2.2100(7)  |
| Ni(2)–P(61)     | 2.2213(7)  | Ni(2)–P(84)      | 2.2007(7)  |
| S(1)–C(2)       | 1.727(3)   | C(2)–N(4)        | 1.316(3)   |
| C(2)–S(3)       | 1.711(2)   | N(7)–C(8)        | 1.314(3)   |
| C(8)–S(9)       | 1.713(2)   | C(8)–S(10)       | 1.718(2)   |
| S(1)–Ni(1)–S(3) | 78.41(2)   | S(9)–Ni(2)–S(10) | 78.27(2)   |
| S(1)–C(2)–S(3)  | 109.07(13) | S(9)–C(8)–S(10)  | 109.31(13) |

**Table 2.** Selected bond lengths (Å) and angles (°) for **3**.

|                 |            |                  |            |
|-----------------|------------|------------------|------------|
| Pd(1)–S(1)      | 2.3516(6)  | Pd(1)–S(3)       | 2.3348(6)  |
| Pd(1)–P(25)     | 2.3018(6)  | Pd(1)–P(48)      | 2.2923(6)  |
| Pd(2)–S(9)      | 2.3445(7)  | Pd(2)–S(10)      | 2.3347(6)  |
| Pd(2)–P(61)     | 2.3110(6)  | Pd(2)–P(84)      | 2.2906(7)  |
| S(1)–C(2)       | 1.728(2)   | C(2)–N(4)        | 1.313(3)   |
| C(2)–S(3)       | 1.719(2)   | N(7)–C(8)        | 1.323(3)   |
| C(8)–S(9)       | 1.723(2)   | C(8)–S(10)       | 1.709(2)   |
| S(1)–Pd(1)–S(3) | 75.07(2)   | S(9)–Pd(2)–S(10) | 74.98(2)   |
| S(1)–C(2)–S(3)  | 111.88(14) | S(9)–C(8)–S(10)  | 112.15(13) |

**Table 3.** Selected bond lengths (Å) and angles (°) for **6**.

|              |            |                 |            |
|--------------|------------|-----------------|------------|
| Au(1)–S(1)   | 2.3290(10) | Au(1)–P(13)     | 2.2483(10) |
| Au(1)··S(3)  | 3.0756(10) | S(1)–C(2)       | 1.747(4)   |
| C(2)–N(4)    | 1.343(5)   | C(2)–S(3)       | 1.695(4)   |
| P(13)–Au(1)– | 177.86(3)  | Au(1)–S(1)–C(2) | 97.67(14)  |

**Table 4.** Selected bond lengths (Å) and angles (°) for **7**.

|                  |           |                 |            |
|------------------|-----------|-----------------|------------|
| Au(1)–S(1)       | 2.3233(5) | Au(1)–P(13)     | 2.2440(6)  |
| Au(1)··S(3)      | 3.1196(5) | S(1)–C(2)       | 1.7436(19) |
| C(2)–N(4)        | 1.349(2)  | C(2)–S(3)       | 1.6922(19) |
| P(13)–Au(1)–S(1) | 175.07(2) | Au(1)–S(1)–C(2) | 99.07(6)   |

**Fig. S1** The molecular structure of the dication in **2** (30% probability ellipsoids).

**Fig. S2** The molecular structure of the dication in **3** (30% probability ellipsoids).

**Fig. S3** The molecular structure of the centrosymmetric complex **6** (50% probability ellipsoids).

**Fig. S4** The molecular structure of the centrosymmetric complex **7** (50% probability ellipsoids).

**Fig. S5** The asymmetric unit in the structure of **7** showing the disorder in the binding of the AuPMe<sub>3</sub> unit. The major (*ca.* 96%) occupancy orientation is shown with dashed bonds, the minor (*ca.* 4%) with open bonds.

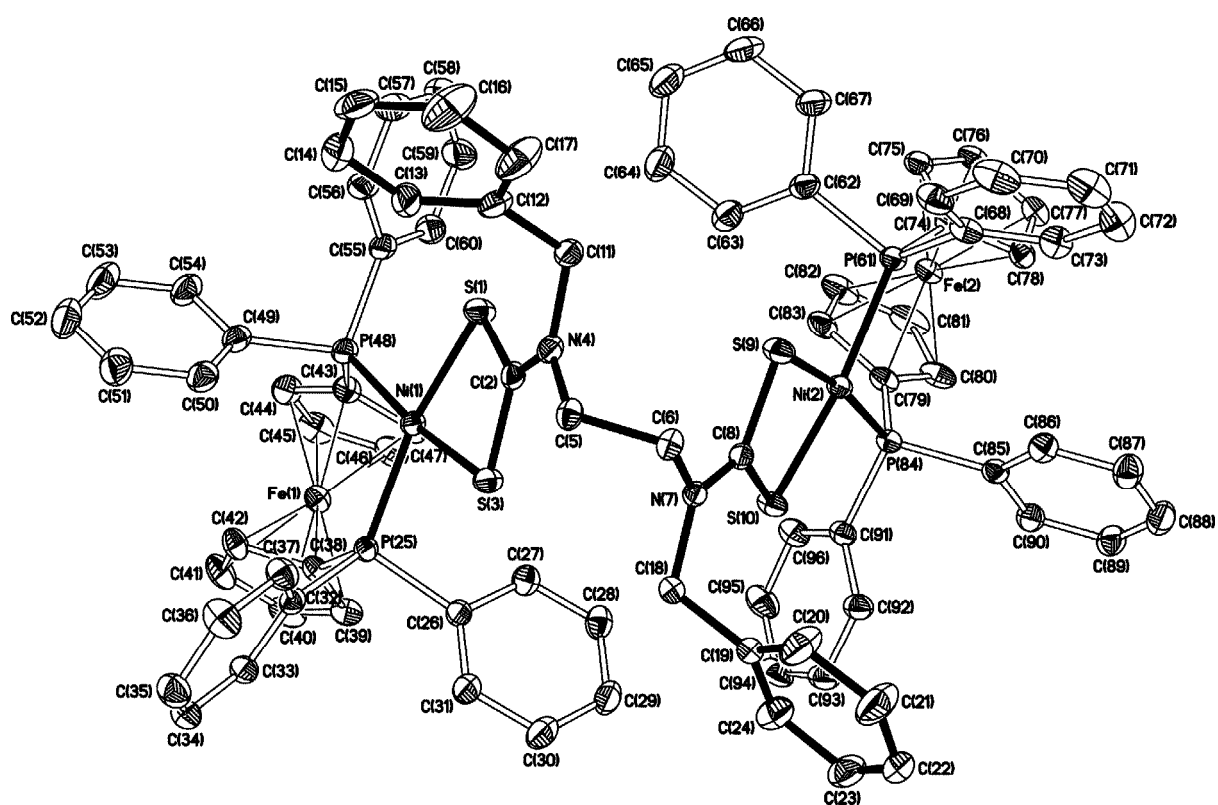

Fig. S1

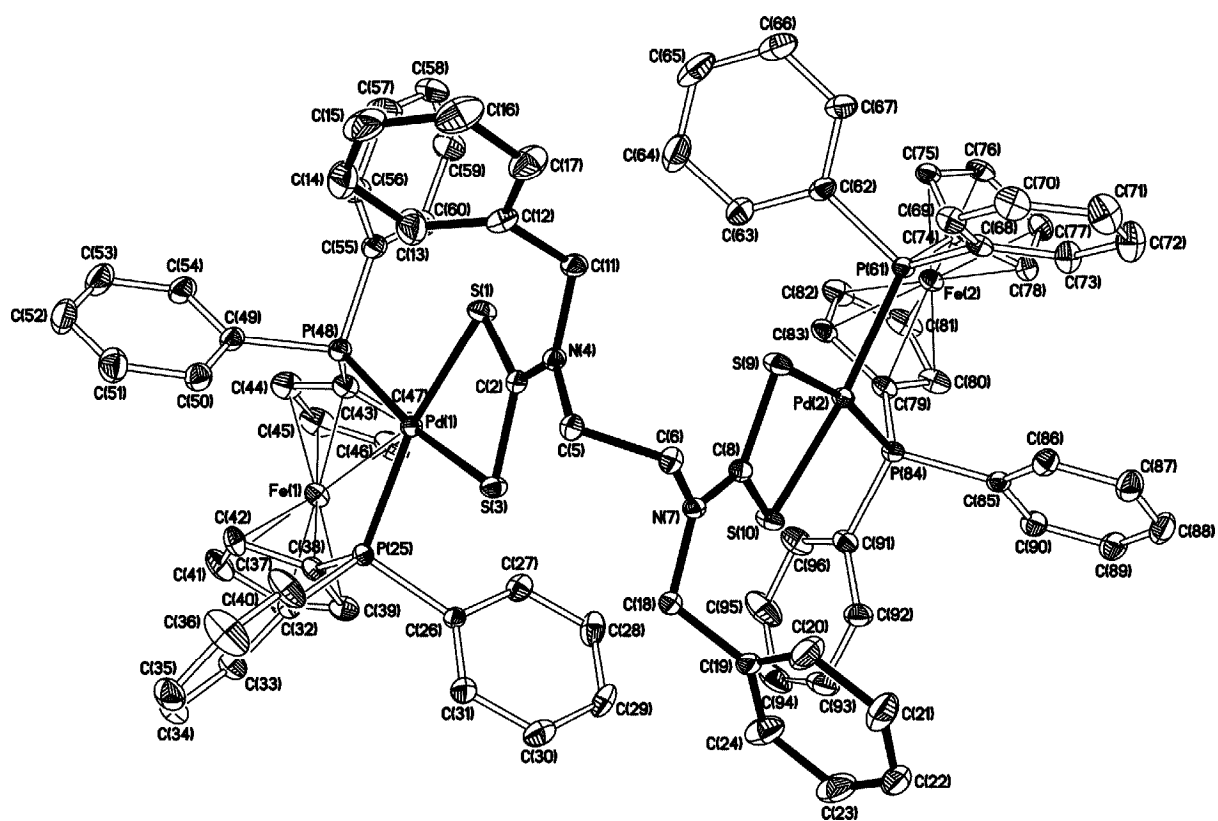

Fig. S2

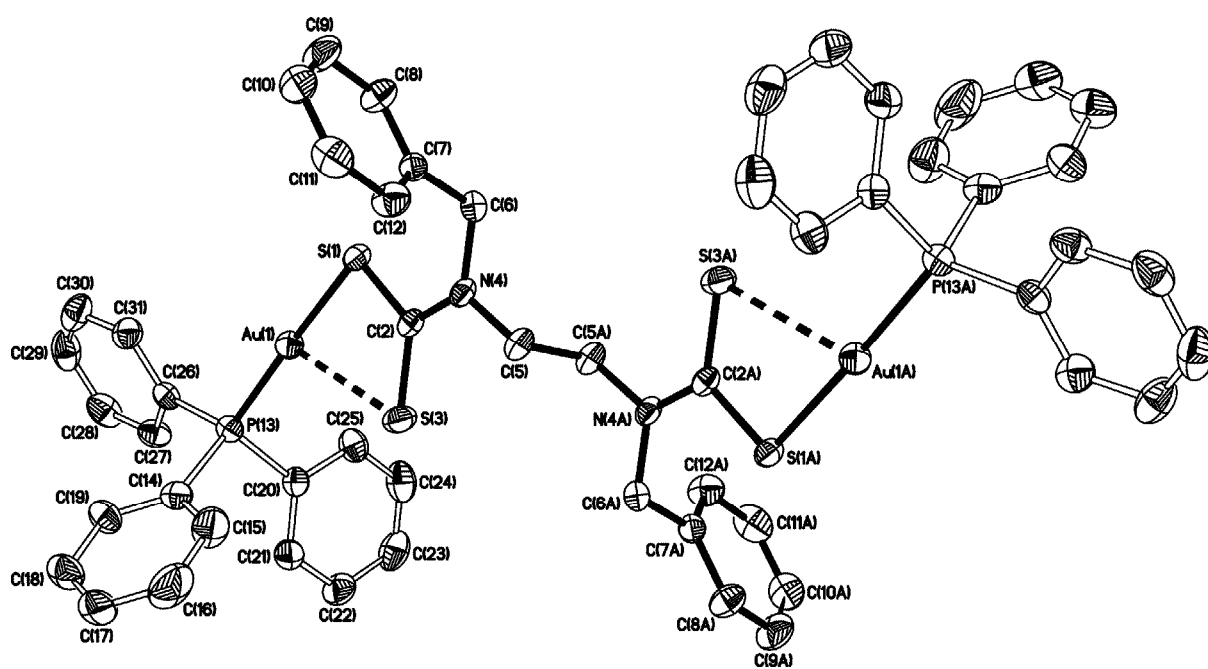

Fig. S3

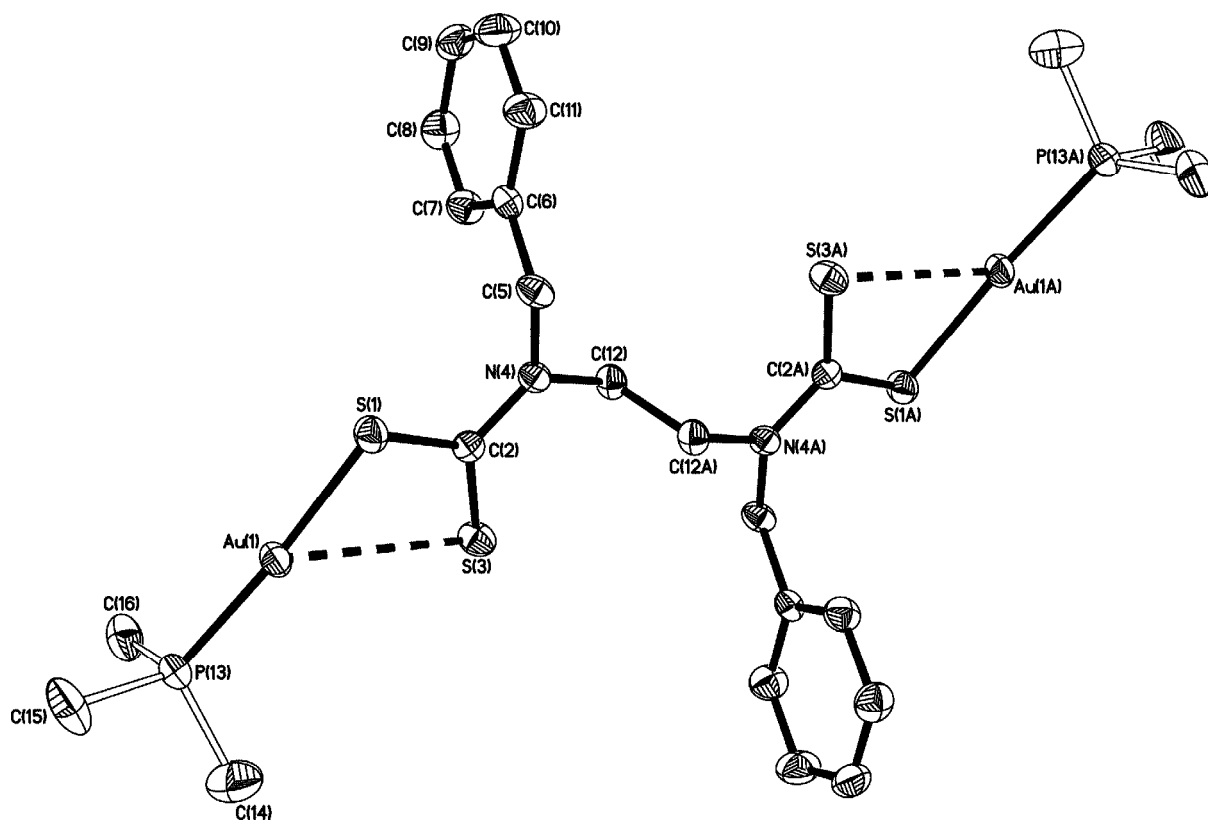

Fig. S4

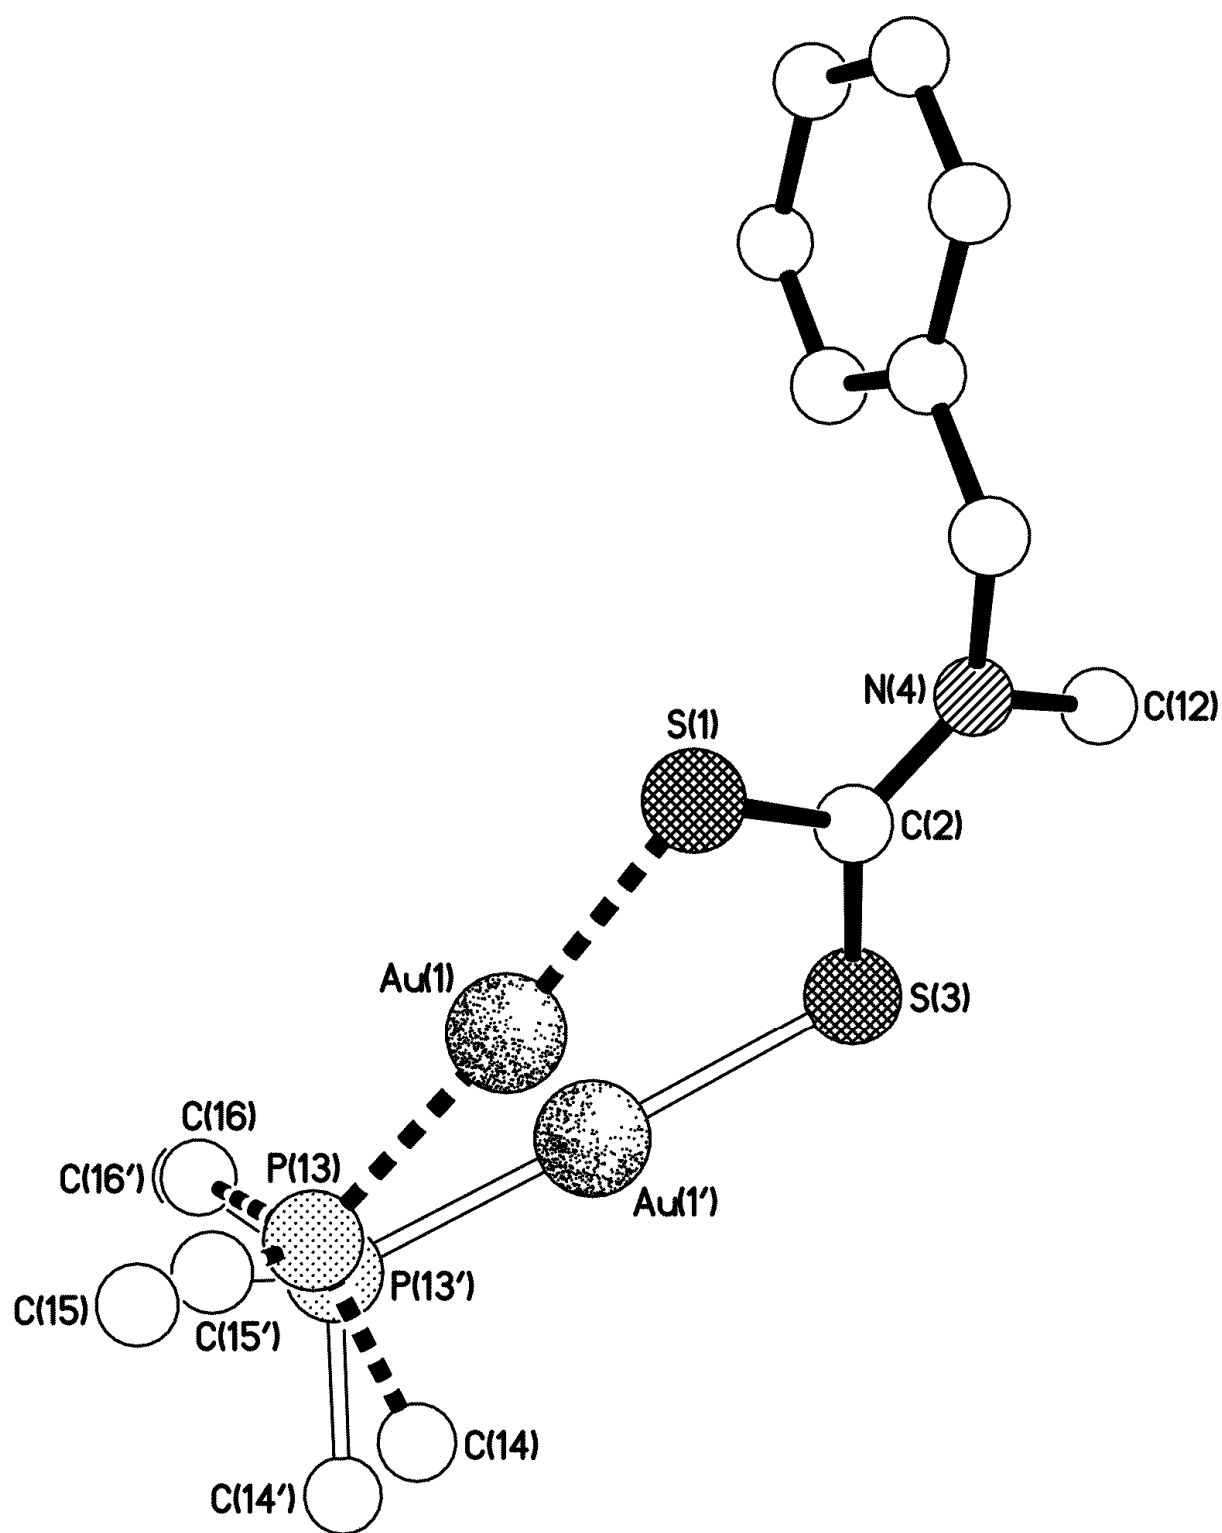

Fig. S5

Table 5. Complete bond lengths [Å] and angles [°] for **2**.

|               |           |
|---------------|-----------|
| Ni(1)-P(48)   | 2.2070(7) |
| Ni(1)-P(25)   | 2.2119(7) |
| Ni(1)-S(1)    | 2.2143(7) |
| Ni(1)-S(3)    | 2.2162(7) |
| Ni(2)-P(84)   | 2.2007(7) |
| Ni(2)-S(10)   | 2.2100(7) |
| Ni(2)-P(61)   | 2.2213(7) |
| Ni(2)-S(9)    | 2.2230(7) |
| Fe(1)-C(43)   | 2.014(3)  |
| Fe(1)-C(38)   | 2.016(2)  |
| Fe(1)-C(44)   | 2.027(3)  |
| Fe(1)-C(42)   | 2.030(3)  |
| Fe(1)-C(47)   | 2.037(3)  |
| Fe(1)-C(39)   | 2.052(3)  |
| Fe(1)-C(45)   | 2.062(3)  |
| Fe(1)-C(41)   | 2.064(3)  |
| Fe(1)-C(40)   | 2.065(3)  |
| Fe(1)-C(46)   | 2.070(3)  |
| Fe(2)-C(79)   | 2.012(2)  |
| Fe(2)-C(78)   | 2.018(2)  |
| Fe(2)-C(74)   | 2.022(2)  |
| Fe(2)-C(83)   | 2.035(3)  |
| Fe(2)-C(80)   | 2.038(3)  |
| Fe(2)-C(75)   | 2.046(3)  |
| Fe(2)-C(77)   | 2.058(2)  |
| Fe(2)-C(81)   | 2.063(3)  |
| Fe(2)-C(82)   | 2.069(3)  |
| Fe(2)-C(76)   | 2.071(2)  |
| S(1)-C(2)     | 1.727(3)  |
| C(2)-N(4)     | 1.316(3)  |
| C(2)-S(3)     | 1.711(2)  |
| N(4)-C(5)     | 1.468(3)  |
| N(4)-C(11)    | 1.479(3)  |
| C(5)-C(6)     | 1.527(3)  |
| C(6)-N(7)     | 1.475(3)  |
| N(7)-C(8)     | 1.314(3)  |
| N(7)-C(18)    | 1.481(3)  |
| C(8)-S(9)     | 1.713(2)  |
| C(8)-S(10)    | 1.718(2)  |
| C(11)-C(12)   | 1.510(3)  |
| C(11)-C(12')  | 1.594(11) |
| C(12)-C(13)   | 1.3900    |
| C(12)-C(17)   | 1.3900    |
| C(13)-C(14)   | 1.3900    |
| C(14)-C(15)   | 1.3900    |
| C(15)-C(16)   | 1.3900    |
| C(16)-C(17)   | 1.3900    |
| C(12')-C(13') | 1.3900    |
| C(12')-C(17') | 1.3900    |
| C(13')-C(14') | 1.3900    |
| C(14')-C(15') | 1.3900    |
| C(15')-C(16') | 1.3900    |
| C(16')-C(17') | 1.3900    |
| C(18)-C(19)   | 1.506(3)  |
| C(19)-C(24)   | 1.377(4)  |
| C(19)-C(20)   | 1.379(4)  |
| C(20)-C(21)   | 1.387(5)  |
| C(21)-C(22)   | 1.369(6)  |

|               |          |
|---------------|----------|
| C(22)-C(23)   | 1.353(5) |
| C(23)-C(24)   | 1.390(5) |
| P(25)-C(38)   | 1.803(2) |
| P(25)-C(26)   | 1.820(2) |
| P(25)-C(32)   | 1.829(3) |
| C(26)-C(31)   | 1.379(4) |
| C(26)-C(27)   | 1.391(4) |
| C(27)-C(28)   | 1.386(4) |
| C(28)-C(29)   | 1.369(5) |
| C(29)-C(30)   | 1.385(5) |
| C(30)-C(31)   | 1.389(5) |
| C(32)-C(37)   | 1.392(4) |
| C(32)-C(33)   | 1.401(3) |
| C(33)-C(34)   | 1.379(4) |
| C(34)-C(35)   | 1.384(4) |
| C(35)-C(36)   | 1.383(5) |
| C(36)-C(37)   | 1.387(4) |
| C(38)-C(42)   | 1.433(4) |
| C(38)-C(39)   | 1.435(4) |
| C(39)-C(40)   | 1.428(4) |
| C(40)-C(41)   | 1.407(5) |
| C(41)-C(42)   | 1.429(4) |
| C(43)-C(47)   | 1.438(4) |
| C(43)-C(44)   | 1.441(4) |
| C(43)-P(48)   | 1.800(3) |
| C(44)-C(45)   | 1.417(5) |
| C(45)-C(46)   | 1.415(5) |
| C(46)-C(47)   | 1.426(4) |
| P(48)-C(55')  | 1.802(7) |
| P(48)-C(49)   | 1.816(3) |
| P(48)-C(55)   | 1.864(3) |
| C(49)-C(50)   | 1.389(5) |
| C(49)-C(54)   | 1.405(4) |
| C(50)-C(51)   | 1.384(5) |
| C(51)-C(52)   | 1.386(6) |
| C(52)-C(53)   | 1.380(7) |
| C(53)-C(54)   | 1.382(5) |
| C(55)-C(56)   | 1.3900   |
| C(55)-C(60)   | 1.3900   |
| C(56)-C(57)   | 1.3900   |
| C(57)-C(58)   | 1.3900   |
| C(58)-C(59)   | 1.3900   |
| C(59)-C(60)   | 1.3900   |
| C(55')-C(56') | 1.3900   |
| C(55')-C(60') | 1.3900   |
| C(56')-C(57') | 1.3900   |
| C(57')-C(58') | 1.3900   |
| C(58')-C(59') | 1.3900   |
| C(59')-C(60') | 1.3900   |
| P(61)-C(74)   | 1.814(2) |
| P(61)-C(62)   | 1.822(2) |
| P(61)-C(68)   | 1.839(3) |
| P(61)-C(62')  | 1.846(7) |
| C(62)-C(63)   | 1.3900   |
| C(62)-C(67)   | 1.3900   |
| C(63)-C(64)   | 1.3900   |
| C(64)-C(65)   | 1.3900   |
| C(65)-C(66)   | 1.3900   |
| C(66)-C(67)   | 1.3900   |
| C(62')-C(63') | 1.3900   |



|               |          |
|---------------|----------|
| C(62')-C(67') | 1.3900   |
| C(63')-C(64') | 1.3900   |
| C(64')-C(65') | 1.3900   |
| C(65')-C(66') | 1.3900   |
| C(66')-C(67') | 1.3900   |
| C(68)-C(69)   | 1.396(4) |
| C(68)-C(73)   | 1.397(4) |
| C(69)-C(70)   | 1.401(5) |
| C(70)-C(71)   | 1.366(6) |
| C(71)-C(72)   | 1.377(5) |
| C(72)-C(73)   | 1.388(4) |
| C(74)-C(78)   | 1.439(4) |
| C(74)-C(75)   | 1.443(4) |
| C(75)-C(76)   | 1.420(4) |
| C(76)-C(77)   | 1.411(4) |
| C(77)-C(78)   | 1.427(4) |
| C(79)-C(83)   | 1.443(4) |
| C(79)-C(80)   | 1.447(4) |
| C(79)-P(84)   | 1.797(3) |
| C(80)-C(81)   | 1.423(5) |
| C(81)-C(82)   | 1.416(6) |
| C(82)-C(83)   | 1.424(4) |
| P(84)-C(85)   | 1.816(3) |
| P(84)-C(91)   | 1.830(2) |
| C(85)-C(86)   | 1.394(4) |
| C(85)-C(90)   | 1.398(4) |
| C(86)-C(87)   | 1.388(4) |
| C(87)-C(88)   | 1.388(5) |
| C(88)-C(89)   | 1.381(5) |
| C(89)-C(90)   | 1.388(4) |
| C(91)-C(92)   | 1.391(4) |
| C(91)-C(96)   | 1.392(4) |
| C(92)-C(93)   | 1.393(4) |
| C(93)-C(94)   | 1.382(5) |
| C(94)-C(95)   | 1.386(5) |
| C(95)-C(96)   | 1.392(4) |

|                   |            |
|-------------------|------------|
| P(48)-Ni(1)-P(25) | 100.76(3)  |
| P(48)-Ni(1)-S(1)  | 92.94(3)   |
| P(25)-Ni(1)-S(1)  | 166.29(3)  |
| P(48)-Ni(1)-S(3)  | 170.59(3)  |
| P(25)-Ni(1)-S(3)  | 87.94(2)   |
| S(1)-Ni(1)-S(3)   | 78.41(2)   |
| P(84)-Ni(2)-S(10) | 92.06(2)   |
| P(84)-Ni(2)-P(61) | 101.05(3)  |
| S(10)-Ni(2)-P(61) | 166.89(3)  |
| P(84)-Ni(2)-S(9)  | 170.11(3)  |
| S(10)-Ni(2)-S(9)  | 78.27(2)   |
| P(61)-Ni(2)-S(9)  | 88.63(2)   |
| C(43)-Fe(1)-C(38) | 108.55(10) |
| C(43)-Fe(1)-C(44) | 41.76(11)  |
| C(38)-Fe(1)-C(44) | 136.11(12) |
| C(43)-Fe(1)-C(42) | 109.44(12) |
| C(38)-Fe(1)-C(42) | 41.48(10)  |
| C(44)-Fe(1)-C(42) | 108.28(13) |
| C(43)-Fe(1)-C(47) | 41.57(12)  |
| C(38)-Fe(1)-C(47) | 111.81(11) |
| C(44)-Fe(1)-C(47) | 69.40(12)  |
| C(42)-Fe(1)-C(47) | 140.28(11) |
| C(43)-Fe(1)-C(39) | 137.43(10) |

|                   |            |
|-------------------|------------|
| C(38)-Fe(1)-C(39) | 41.29(10)  |
| C(44)-Fe(1)-C(39) | 177.34(12) |
| C(42)-Fe(1)-C(39) | 69.32(11)  |
| C(47)-Fe(1)-C(39) | 111.61(12) |
| C(43)-Fe(1)-C(45) | 69.10(12)  |
| C(38)-Fe(1)-C(45) | 176.64(13) |
| C(44)-Fe(1)-C(45) | 40.56(14)  |
| C(42)-Fe(1)-C(45) | 136.45(13) |
| C(47)-Fe(1)-C(45) | 68.21(12)  |
| C(39)-Fe(1)-C(45) | 142.03(13) |
| C(43)-Fe(1)-C(41) | 139.19(13) |
| C(38)-Fe(1)-C(41) | 68.97(10)  |
| C(44)-Fe(1)-C(41) | 110.68(13) |
| C(42)-Fe(1)-C(41) | 40.84(11)  |
| C(47)-Fe(1)-C(41) | 178.87(12) |
| C(39)-Fe(1)-C(41) | 68.37(13)  |
| C(45)-Fe(1)-C(41) | 111.07(13) |
| C(43)-Fe(1)-C(40) | 177.07(11) |
| C(38)-Fe(1)-C(40) | 68.56(10)  |
| C(44)-Fe(1)-C(40) | 140.08(12) |
| C(42)-Fe(1)-C(40) | 68.15(12)  |
| C(47)-Fe(1)-C(40) | 139.44(14) |
| C(39)-Fe(1)-C(40) | 40.57(12)  |
| C(45)-Fe(1)-C(40) | 113.76(12) |
| C(41)-Fe(1)-C(40) | 39.86(15)  |
| C(43)-Fe(1)-C(46) | 69.21(12)  |
| C(38)-Fe(1)-C(46) | 141.96(12) |
| C(44)-Fe(1)-C(46) | 68.42(14)  |
| C(42)-Fe(1)-C(46) | 176.40(13) |
| C(47)-Fe(1)-C(46) | 40.63(12)  |
| C(39)-Fe(1)-C(46) | 114.01(13) |
| C(45)-Fe(1)-C(46) | 40.04(15)  |
| C(41)-Fe(1)-C(46) | 138.27(12) |
| C(40)-Fe(1)-C(46) | 113.30(13) |
| C(79)-Fe(2)-C(78) | 110.10(11) |
| C(79)-Fe(2)-C(74) | 108.45(10) |
| C(78)-Fe(2)-C(74) | 41.73(10)  |
| C(79)-Fe(2)-C(83) | 41.78(12)  |
| C(78)-Fe(2)-C(83) | 139.61(11) |
| C(74)-Fe(2)-C(83) | 109.94(12) |
| C(79)-Fe(2)-C(80) | 41.85(11)  |
| C(78)-Fe(2)-C(80) | 109.99(12) |
| C(74)-Fe(2)-C(80) | 137.36(11) |
| C(83)-Fe(2)-C(80) | 69.81(13)  |
| C(79)-Fe(2)-C(75) | 137.14(11) |
| C(78)-Fe(2)-C(75) | 69.51(10)  |
| C(74)-Fe(2)-C(75) | 41.56(10)  |
| C(83)-Fe(2)-C(75) | 109.81(12) |
| C(80)-Fe(2)-C(75) | 178.80(11) |
| C(79)-Fe(2)-C(77) | 140.41(12) |
| C(78)-Fe(2)-C(77) | 40.97(10)  |
| C(74)-Fe(2)-C(77) | 69.14(10)  |
| C(83)-Fe(2)-C(77) | 177.70(12) |
| C(80)-Fe(2)-C(77) | 112.35(12) |
| C(75)-Fe(2)-C(77) | 68.05(11)  |
| C(79)-Fe(2)-C(81) | 69.11(11)  |
| C(78)-Fe(2)-C(81) | 138.46(14) |
| C(74)-Fe(2)-C(81) | 177.55(11) |
| C(83)-Fe(2)-C(81) | 68.45(14)  |
| C(80)-Fe(2)-C(81) | 40.60(13)  |

|                      |            |
|----------------------|------------|
| C(75)-Fe(2)-C(81)    | 140.45(13) |
| C(77)-Fe(2)-C(81)    | 112.54(13) |
| C(79)-Fe(2)-C(82)    | 69.09(11)  |
| C(78)-Fe(2)-C(82)    | 178.42(14) |
| C(74)-Fe(2)-C(82)    | 139.69(14) |
| C(83)-Fe(2)-C(82)    | 40.59(13)  |
| C(80)-Fe(2)-C(82)    | 68.48(15)  |
| C(75)-Fe(2)-C(82)    | 112.03(14) |
| C(77)-Fe(2)-C(82)    | 138.93(12) |
| C(81)-Fe(2)-C(82)    | 40.08(17)  |
| C(79)-Fe(2)-C(76)    | 177.32(11) |
| C(78)-Fe(2)-C(76)    | 68.64(10)  |
| C(74)-Fe(2)-C(76)    | 68.99(10)  |
| C(83)-Fe(2)-C(76)    | 137.80(12) |
| C(80)-Fe(2)-C(76)    | 140.65(12) |
| C(75)-Fe(2)-C(76)    | 40.35(11)  |
| C(77)-Fe(2)-C(76)    | 39.97(12)  |
| C(81)-Fe(2)-C(76)    | 113.45(11) |
| C(82)-Fe(2)-C(76)    | 112.23(12) |
| C(2)-S(1)-Ni(1)      | 85.27(8)   |
| N(4)-C(2)-S(3)       | 124.75(19) |
| N(4)-C(2)-S(1)       | 126.12(19) |
| S(3)-C(2)-S(1)       | 109.07(13) |
| C(2)-S(3)-Ni(1)      | 85.59(8)   |
| C(2)-N(4)-C(5)       | 121.0(2)   |
| C(2)-N(4)-C(11)      | 121.3(2)   |
| C(5)-N(4)-C(11)      | 117.55(19) |
| N(4)-C(5)-C(6)       | 113.53(19) |
| N(7)-C(6)-C(5)       | 113.30(18) |
| C(8)-N(7)-C(6)       | 120.71(19) |
| C(8)-N(7)-C(18)      | 120.05(18) |
| C(6)-N(7)-C(18)      | 119.04(18) |
| N(7)-C(8)-S(9)       | 125.57(17) |
| N(7)-C(8)-S(10)      | 125.12(17) |
| S(9)-C(8)-S(10)      | 109.31(13) |
| C(8)-S(9)-Ni(2)      | 85.99(8)   |
| C(8)-S(10)-Ni(2)     | 86.29(8)   |
| N(4)-C(11)-C(12)     | 113.3(2)   |
| N(4)-C(11)-C(12')    | 108.7(4)   |
| C(13)-C(12)-C(17)    | 120.0      |
| C(13)-C(12)-C(11)    | 121.6(2)   |
| C(17)-C(12)-C(11)    | 118.4(2)   |
| C(14)-C(13)-C(12)    | 120.0      |
| C(13)-C(14)-C(15)    | 120.0      |
| C(16)-C(15)-C(14)    | 120.0      |
| C(15)-C(16)-C(17)    | 120.0      |
| C(16)-C(17)-C(12)    | 120.0      |
| C(13')-C(12')-C(17') | 120.0      |
| C(13')-C(12')-C(11)  | 114.4(12)  |
| C(17')-C(12')-C(11)  | 125.6(12)  |
| C(14')-C(13')-C(12') | 120.0      |
| C(13')-C(14')-C(15') | 120.0      |
| C(16')-C(15')-C(14') | 120.0      |
| C(15')-C(16')-C(17') | 120.0      |
| C(16')-C(17')-C(12') | 120.0      |
| N(7)-C(18)-C(19)     | 112.10(18) |
| C(24)-C(19)-C(20)    | 117.7(3)   |
| C(24)-C(19)-C(18)    | 120.3(2)   |
| C(20)-C(19)-C(18)    | 122.0(2)   |
| C(19)-C(20)-C(21)    | 121.0(3)   |

|                   |            |
|-------------------|------------|
| C(22)-C(21)-C(20) | 120.0(3)   |
| C(23)-C(22)-C(21) | 119.9(3)   |
| C(22)-C(23)-C(24) | 120.2(3)   |
| C(19)-C(24)-C(23) | 121.2(3)   |
| C(38)-P(25)-C(26) | 104.58(11) |
| C(38)-P(25)-C(32) | 100.47(11) |
| C(26)-P(25)-C(32) | 106.64(11) |
| C(38)-P(25)-Ni(1) | 122.47(8)  |
| C(26)-P(25)-Ni(1) | 104.32(8)  |
| C(32)-P(25)-Ni(1) | 116.99(8)  |
| C(31)-C(26)-C(27) | 119.1(2)   |
| C(31)-C(26)-P(25) | 122.7(2)   |
| C(27)-C(26)-P(25) | 117.9(2)   |
| C(28)-C(27)-C(26) | 120.5(3)   |
| C(29)-C(28)-C(27) | 120.2(3)   |
| C(28)-C(29)-C(30) | 119.8(3)   |
| C(29)-C(30)-C(31) | 120.2(3)   |
| C(26)-C(31)-C(30) | 120.2(3)   |
| C(37)-C(32)-C(33) | 118.9(2)   |
| C(37)-C(32)-P(25) | 121.75(19) |
| C(33)-C(32)-P(25) | 119.37(18) |
| C(34)-C(33)-C(32) | 120.4(2)   |
| C(33)-C(34)-C(35) | 120.4(3)   |
| C(36)-C(35)-C(34) | 119.7(3)   |
| C(35)-C(36)-C(37) | 120.4(3)   |
| C(36)-C(37)-C(32) | 120.2(3)   |
| C(42)-C(38)-C(39) | 108.1(2)   |
| C(42)-C(38)-P(25) | 124.83(19) |
| C(39)-C(38)-P(25) | 127.1(2)   |
| C(42)-C(38)-Fe(1) | 69.77(15)  |
| C(39)-C(38)-Fe(1) | 70.69(15)  |
| P(25)-C(38)-Fe(1) | 126.05(13) |
| C(40)-C(39)-C(38) | 106.9(3)   |
| C(40)-C(39)-Fe(1) | 70.21(18)  |
| C(38)-C(39)-Fe(1) | 68.02(15)  |
| C(41)-C(40)-C(39) | 109.3(2)   |
| C(41)-C(40)-Fe(1) | 70.02(18)  |
| C(39)-C(40)-Fe(1) | 69.22(16)  |
| C(40)-C(41)-C(42) | 108.0(3)   |
| C(40)-C(41)-Fe(1) | 70.13(17)  |
| C(42)-C(41)-Fe(1) | 68.31(15)  |
| C(41)-C(42)-C(38) | 107.7(3)   |
| C(41)-C(42)-Fe(1) | 70.84(16)  |
| C(38)-C(42)-Fe(1) | 68.75(14)  |
| C(47)-C(43)-C(44) | 107.0(2)   |
| C(47)-C(43)-P(48) | 123.5(2)   |
| C(44)-C(43)-P(48) | 129.5(2)   |
| C(47)-C(43)-Fe(1) | 70.07(15)  |
| C(44)-C(43)-Fe(1) | 69.61(16)  |
| P(48)-C(43)-Fe(1) | 122.97(14) |
| C(45)-C(44)-C(43) | 108.0(3)   |
| C(45)-C(44)-Fe(1) | 71.02(18)  |
| C(43)-C(44)-Fe(1) | 68.63(16)  |
| C(46)-C(45)-C(44) | 108.9(3)   |
| C(46)-C(45)-Fe(1) | 70.32(17)  |
| C(44)-C(45)-Fe(1) | 68.42(16)  |
| C(45)-C(46)-C(47) | 108.0(3)   |
| C(45)-C(46)-Fe(1) | 69.64(18)  |
| C(47)-C(46)-Fe(1) | 68.43(16)  |
| C(46)-C(47)-C(43) | 108.2(3)   |

|                      |            |
|----------------------|------------|
| C(46)-C(47)-Fe(1)    | 70.94(16)  |
| C(43)-C(47)-Fe(1)    | 68.36(15)  |
| C(43)-P(48)-C(55')   | 110.8(4)   |
| C(43)-P(48)-C(49)    | 107.06(12) |
| C(55')-P(48)-C(49)   | 97.2(4)    |
| C(43)-P(48)-C(55)    | 101.0(2)   |
| C(49)-P(48)-C(55)    | 105.0(2)   |
| C(43)-P(48)-Ni(1)    | 116.54(9)  |
| C(55')-P(48)-Ni(1)   | 112.3(4)   |
| C(49)-P(48)-Ni(1)    | 111.10(10) |
| C(55)-P(48)-Ni(1)    | 115.01(15) |
| C(50)-C(49)-C(54)    | 119.2(3)   |
| C(50)-C(49)-P(48)    | 119.9(2)   |
| C(54)-C(49)-P(48)    | 120.9(3)   |
| C(51)-C(50)-C(49)    | 120.6(3)   |
| C(50)-C(51)-C(52)    | 119.8(4)   |
| C(53)-C(52)-C(51)    | 120.2(3)   |
| C(52)-C(53)-C(54)    | 120.4(3)   |
| C(53)-C(54)-C(49)    | 119.8(4)   |
| C(56)-C(55)-C(60)    | 120.0      |
| C(56)-C(55)-P(48)    | 117.2(2)   |
| C(60)-C(55)-P(48)    | 122.8(2)   |
| C(57)-C(56)-C(55)    | 120.0      |
| C(56)-C(57)-C(58)    | 120.0      |
| C(59)-C(58)-C(57)    | 120.0      |
| C(60)-C(59)-C(58)    | 120.0      |
| C(59)-C(60)-C(55)    | 120.0      |
| C(56')-C(55')-C(60') | 120.0      |
| C(56')-C(55')-P(48)  | 123.0(5)   |
| C(60')-C(55')-P(48)  | 116.7(5)   |
| C(55')-C(56')-C(57') | 120.0      |
| C(58')-C(57')-C(56') | 120.0      |
| C(57')-C(58')-C(59') | 120.0      |
| C(58')-C(59')-C(60') | 120.0      |
| C(59')-C(60')-C(55') | 120.0      |
| C(74)-P(61)-C(62)    | 101.09(19) |
| C(74)-P(61)-C(68)    | 103.93(11) |
| C(62)-P(61)-C(68)    | 108.5(2)   |
| C(74)-P(61)-C(62')   | 106.3(4)   |
| C(68)-P(61)-C(62')   | 98.8(4)    |
| C(74)-P(61)-Ni(2)    | 123.62(8)  |
| C(62)-P(61)-Ni(2)    | 106.59(14) |
| C(68)-P(61)-Ni(2)    | 111.97(8)  |
| C(62')-P(61)-Ni(2)   | 109.3(4)   |
| C(63)-C(62)-C(67)    | 120.0      |
| C(63)-C(62)-P(61)    | 119.1(2)   |
| C(67)-C(62)-P(61)    | 120.9(2)   |
| C(62)-C(63)-C(64)    | 120.0      |
| C(63)-C(64)-C(65)    | 120.0      |
| C(64)-C(65)-C(66)    | 120.0      |
| C(67)-C(66)-C(65)    | 120.0      |
| C(66)-C(67)-C(62)    | 120.0      |
| C(63')-C(62')-C(67') | 120.0      |
| C(63')-C(62')-P(61)  | 118.3(6)   |
| C(67')-C(62')-P(61)  | 121.7(6)   |
| C(64')-C(63')-C(62') | 120.0      |
| C(63')-C(64')-C(65') | 120.0      |
| C(64')-C(65')-C(66') | 120.0      |
| C(67')-C(66')-C(65') | 120.0      |
| C(66')-C(67')-C(62') | 120.0      |

|                   |            |
|-------------------|------------|
| C(69)-C(68)-C(73) | 118.1(3)   |
| C(69)-C(68)-P(61) | 121.4(2)   |
| C(73)-C(68)-P(61) | 120.48(19) |
| C(68)-C(69)-C(70) | 120.0(3)   |
| C(71)-C(70)-C(69) | 120.8(3)   |
| C(70)-C(71)-C(72) | 120.0(3)   |
| C(71)-C(72)-C(73) | 120.0(3)   |
| C(72)-C(73)-C(68) | 121.1(3)   |
| C(78)-C(74)-C(75) | 107.0(2)   |
| C(78)-C(74)-P(61) | 128.36(19) |
| C(75)-C(74)-P(61) | 124.58(19) |
| C(78)-C(74)-Fe(2) | 68.99(13)  |
| C(75)-C(74)-Fe(2) | 70.10(14)  |
| P(61)-C(74)-Fe(2) | 123.39(12) |
| C(76)-C(75)-C(74) | 108.1(2)   |
| C(76)-C(75)-Fe(2) | 70.78(15)  |
| C(74)-C(75)-Fe(2) | 68.34(14)  |
| C(77)-C(76)-C(75) | 108.4(2)   |
| C(77)-C(76)-Fe(2) | 69.52(14)  |
| C(75)-C(76)-Fe(2) | 68.88(14)  |
| C(76)-C(77)-C(78) | 108.7(2)   |
| C(76)-C(77)-Fe(2) | 70.51(15)  |
| C(78)-C(77)-Fe(2) | 68.03(14)  |
| C(77)-C(78)-C(74) | 107.8(2)   |
| C(77)-C(78)-Fe(2) | 71.00(14)  |
| C(74)-C(78)-Fe(2) | 69.28(14)  |
| C(83)-C(79)-C(80) | 107.5(2)   |
| C(83)-C(79)-P(84) | 123.5(2)   |
| C(80)-C(79)-P(84) | 128.9(2)   |
| C(83)-C(79)-Fe(2) | 69.97(15)  |
| C(80)-C(79)-Fe(2) | 70.07(15)  |
| P(84)-C(79)-Fe(2) | 123.71(13) |
| C(81)-C(80)-C(79) | 107.3(3)   |
| C(81)-C(80)-Fe(2) | 70.62(18)  |
| C(79)-C(80)-Fe(2) | 68.08(15)  |
| C(82)-C(81)-C(80) | 109.0(3)   |
| C(82)-C(81)-Fe(2) | 70.19(18)  |
| C(80)-C(81)-Fe(2) | 68.77(15)  |
| C(81)-C(82)-C(83) | 108.5(3)   |
| C(81)-C(82)-Fe(2) | 69.73(18)  |
| C(83)-C(82)-Fe(2) | 68.41(15)  |
| C(82)-C(83)-C(79) | 107.7(3)   |
| C(82)-C(83)-Fe(2) | 71.00(17)  |
| C(79)-C(83)-Fe(2) | 68.25(15)  |
| C(79)-P(84)-C(85) | 106.67(12) |
| C(79)-P(84)-C(91) | 102.91(11) |
| C(85)-P(84)-C(91) | 101.81(11) |
| C(79)-P(84)-Ni(2) | 116.30(9)  |
| C(85)-P(84)-Ni(2) | 111.27(8)  |
| C(91)-P(84)-Ni(2) | 116.41(8)  |
| C(86)-C(85)-C(90) | 119.5(2)   |
| C(86)-C(85)-P(84) | 120.08(19) |
| C(90)-C(85)-P(84) | 120.4(2)   |
| C(87)-C(86)-C(85) | 120.1(3)   |
| C(86)-C(87)-C(88) | 120.0(3)   |
| C(89)-C(88)-C(87) | 120.4(3)   |
| C(88)-C(89)-C(90) | 120.1(3)   |
| C(89)-C(90)-C(85) | 120.1(3)   |
| C(92)-C(91)-C(96) | 119.4(2)   |
| C(92)-C(91)-P(84) | 119.4(2)   |

|                   |          |
|-------------------|----------|
| C(96)-C(91)-P(84) | 121.3(2) |
| C(91)-C(92)-C(93) | 120.6(3) |
| C(94)-C(93)-C(92) | 119.7(3) |
| C(93)-C(94)-C(95) | 120.0(3) |
| C(94)-C(95)-C(96) | 120.4(3) |
| C(95)-C(96)-C(91) | 119.9(3) |

Table 6. Complete bond lengths [Å] and angles [°] for **3**.

|              |           |
|--------------|-----------|
| Pd(1)-P(48)  | 2.2923(6) |
| Pd(1)-P(25)  | 2.3018(6) |
| Pd(1)-S(3)   | 2.3348(6) |
| Pd(1)-S(1)   | 2.3516(6) |
| Pd(2)-P(84)  | 2.2906(7) |
| Pd(2)-P(61)  | 2.3110(6) |
| Pd(2)-S(10)  | 2.3347(6) |
| Pd(2)-S(9)   | 2.3445(7) |
| Fe(1)-C(43)  | 2.015(3)  |
| Fe(1)-C(42)  | 2.020(3)  |
| Fe(1)-C(38)  | 2.024(2)  |
| Fe(1)-C(47)  | 2.027(3)  |
| Fe(1)-C(44)  | 2.027(3)  |
| Fe(1)-C(39)  | 2.048(3)  |
| Fe(1)-C(45)  | 2.049(3)  |
| Fe(1)-C(46)  | 2.050(3)  |
| Fe(1)-C(41)  | 2.058(3)  |
| Fe(1)-C(40)  | 2.065(3)  |
| Fe(2)-C(79)  | 2.012(2)  |
| Fe(2)-C(78)  | 2.020(3)  |
| Fe(2)-C(74)  | 2.028(3)  |
| Fe(2)-C(83)  | 2.029(3)  |
| Fe(2)-C(80)  | 2.038(3)  |
| Fe(2)-C(75)  | 2.043(3)  |
| Fe(2)-C(81)  | 2.059(3)  |
| Fe(2)-C(77)  | 2.060(3)  |
| Fe(2)-C(82)  | 2.066(3)  |
| Fe(2)-C(76)  | 2.066(2)  |
| S(1)-C(2)    | 1.728(2)  |
| C(2)-N(4)    | 1.313(3)  |
| C(2)-S(3)    | 1.719(2)  |
| N(4)-C(11)   | 1.471(3)  |
| N(4)-C(5)    | 1.474(3)  |
| C(5)-C(6)    | 1.526(3)  |
| C(6)-N(7)    | 1.470(3)  |
| N(7)-C(8)    | 1.323(3)  |
| N(7)-C(18)   | 1.479(3)  |
| C(8)-S(10)   | 1.709(2)  |
| C(8)-S(9)    | 1.723(2)  |
| C(11)-C(12)  | 1.514(4)  |
| C(12)-C(13)  | 1.368(4)  |
| C(12)-C(17)  | 1.383(4)  |
| C(13)-C(14)  | 1.396(4)  |
| C(14)-C(15)  | 1.359(6)  |
| C(15)-C(16)  | 1.364(6)  |
| C(16)-C(17)  | 1.382(5)  |
| C(18)-C(19)  | 1.498(3)  |
| C(18)-C(19') | 1.550(11) |
| C(19)-C(20)  | 1.3900    |

|               |          |
|---------------|----------|
| C(19)-C(24)   | 1.3900   |
| C(20)-C(21)   | 1.3900   |
| C(21)-C(22)   | 1.3900   |
| C(22)-C(23)   | 1.3900   |
| C(23)-C(24)   | 1.3900   |
| C(19')-C(20') | 1.3900   |
| C(19')-C(24') | 1.3900   |
| C(20')-C(21') | 1.3900   |
| C(21')-C(22') | 1.3900   |
| C(22')-C(23') | 1.3900   |
| C(23')-C(24') | 1.3900   |
| P(25)-C(38)   | 1.790(3) |
| P(25)-C(26)   | 1.804(3) |
| P(25)-C(32)   | 1.827(2) |
| P(25)-C(26')  | 1.846(7) |
| C(26)-C(27)   | 1.3900   |
| C(26)-C(31)   | 1.3900   |
| C(27)-C(28)   | 1.3900   |
| C(28)-C(29)   | 1.3900   |
| C(29)-C(30)   | 1.3900   |
| C(30)-C(31)   | 1.3900   |
| C(26')-C(27') | 1.3900   |
| C(26')-C(31') | 1.3900   |
| C(27')-C(28') | 1.3900   |
| C(28')-C(29') | 1.3900   |
| C(29')-C(30') | 1.3900   |
| C(30')-C(31') | 1.3900   |
| C(32)-C(37)   | 1.373(4) |
| C(32)-C(33)   | 1.394(3) |
| C(33)-C(34)   | 1.386(4) |
| C(34)-C(35)   | 1.373(4) |
| C(35)-C(36)   | 1.369(5) |
| C(36)-C(37)   | 1.393(4) |
| C(38)-C(39)   | 1.432(4) |
| C(38)-C(42)   | 1.438(4) |
| C(39)-C(40)   | 1.433(4) |
| C(40)-C(41)   | 1.415(5) |
| C(41)-C(42)   | 1.425(4) |
| C(43)-C(47)   | 1.429(4) |
| C(43)-C(44)   | 1.448(4) |
| C(43)-P(48)   | 1.792(3) |
| C(44)-C(45)   | 1.409(5) |
| C(45)-C(46)   | 1.410(5) |
| C(46)-C(47)   | 1.422(4) |
| P(48)-C(49)   | 1.816(3) |
| P(48)-C(55)   | 1.825(3) |
| C(49)-C(50)   | 1.384(4) |
| C(49)-C(54)   | 1.395(4) |
| C(50)-C(51)   | 1.379(4) |
| C(51)-C(52)   | 1.378(5) |
| C(52)-C(53)   | 1.361(5) |
| C(53)-C(54)   | 1.383(4) |
| C(55)-C(60)   | 1.372(4) |
| C(55)-C(56)   | 1.400(4) |
| C(56)-C(57)   | 1.375(4) |
| C(57)-C(58)   | 1.386(6) |
| C(58)-C(59)   | 1.347(6) |
| C(59)-C(60)   | 1.406(4) |
| P(61)-C(74)   | 1.806(2) |
| P(61)-C(62)   | 1.810(3) |



|             |          |
|-------------|----------|
| P(61)-C(68) | 1.830(3) |
| C(62)-C(67) | 1.389(4) |
| C(62)-C(63) | 1.395(4) |
| C(63)-C(64) | 1.397(4) |
| C(64)-C(65) | 1.398(6) |
| C(65)-C(66) | 1.373(5) |
| C(66)-C(67) | 1.374(4) |
| C(68)-C(73) | 1.390(4) |
| C(68)-C(69) | 1.391(4) |
| C(69)-C(70) | 1.385(4) |
| C(70)-C(71) | 1.379(4) |
| C(71)-C(72) | 1.382(4) |
| C(72)-C(73) | 1.387(4) |
| C(74)-C(75) | 1.437(3) |
| C(74)-C(78) | 1.438(3) |
| C(75)-C(76) | 1.423(4) |
| C(76)-C(77) | 1.424(4) |
| C(77)-C(78) | 1.426(4) |
| C(79)-C(83) | 1.434(4) |
| C(79)-C(80) | 1.442(4) |
| C(79)-P(84) | 1.796(3) |
| C(80)-C(81) | 1.437(4) |
| C(81)-C(82) | 1.409(5) |
| C(82)-C(83) | 1.421(4) |
| P(84)-C(91) | 1.812(3) |
| P(84)-C(85) | 1.815(3) |
| C(85)-C(86) | 1.384(4) |
| C(85)-C(90) | 1.398(4) |
| C(86)-C(87) | 1.389(4) |
| C(87)-C(88) | 1.393(4) |
| C(88)-C(89) | 1.374(5) |
| C(89)-C(90) | 1.369(4) |
| C(91)-C(96) | 1.385(4) |
| C(91)-C(92) | 1.405(4) |
| C(92)-C(93) | 1.392(4) |
| C(93)-C(94) | 1.378(5) |
| C(94)-C(95) | 1.375(5) |
| C(95)-C(96) | 1.386(4) |

|                   |            |
|-------------------|------------|
| P(48)-Pd(1)-P(25) | 99.27(2)   |
| P(48)-Pd(1)-S(3)  | 170.12(2)  |
| P(25)-Pd(1)-S(3)  | 90.25(2)   |
| P(48)-Pd(1)-S(1)  | 95.41(2)   |
| P(25)-Pd(1)-S(1)  | 165.31(2)  |
| S(3)-Pd(1)-S(1)   | 75.07(2)   |
| P(84)-Pd(2)-P(61) | 99.49(2)   |
| P(84)-Pd(2)-S(10) | 94.27(2)   |
| P(61)-Pd(2)-S(10) | 166.19(2)  |
| P(84)-Pd(2)-S(9)  | 169.19(2)  |
| P(61)-Pd(2)-S(9)  | 91.23(2)   |
| S(10)-Pd(2)-S(9)  | 74.98(2)   |
| C(43)-Fe(1)-C(42) | 109.36(12) |
| C(43)-Fe(1)-C(38) | 109.47(10) |
| C(42)-Fe(1)-C(38) | 41.67(10)  |
| C(43)-Fe(1)-C(47) | 41.39(11)  |
| C(42)-Fe(1)-C(47) | 139.64(11) |
| C(38)-Fe(1)-C(47) | 111.69(11) |
| C(43)-Fe(1)-C(44) | 41.98(11)  |
| C(42)-Fe(1)-C(44) | 108.52(13) |

|                   |            |
|-------------------|------------|
| C(38)-Fe(1)-C(44) | 137.41(12) |
| C(47)-Fe(1)-C(44) | 69.58(12)  |
| C(43)-Fe(1)-C(39) | 138.78(11) |
| C(42)-Fe(1)-C(39) | 69.31(12)  |
| C(38)-Fe(1)-C(39) | 41.16(10)  |
| C(47)-Fe(1)-C(39) | 112.34(12) |
| C(44)-Fe(1)-C(39) | 177.77(13) |
| C(43)-Fe(1)-C(45) | 69.14(12)  |
| C(42)-Fe(1)-C(45) | 136.80(13) |
| C(38)-Fe(1)-C(45) | 177.80(13) |
| C(47)-Fe(1)-C(45) | 68.52(13)  |
| C(44)-Fe(1)-C(45) | 40.43(13)  |
| C(39)-Fe(1)-C(45) | 140.97(13) |
| C(43)-Fe(1)-C(46) | 69.15(12)  |
| C(42)-Fe(1)-C(46) | 176.86(13) |
| C(38)-Fe(1)-C(46) | 141.25(13) |
| C(47)-Fe(1)-C(46) | 40.82(12)  |
| C(44)-Fe(1)-C(46) | 68.48(15)  |
| C(39)-Fe(1)-C(46) | 113.68(14) |
| C(45)-Fe(1)-C(46) | 40.23(14)  |
| C(43)-Fe(1)-C(41) | 138.20(13) |
| C(42)-Fe(1)-C(41) | 40.88(11)  |
| C(38)-Fe(1)-C(41) | 69.23(11)  |
| C(47)-Fe(1)-C(41) | 179.03(13) |
| C(44)-Fe(1)-C(41) | 109.56(13) |
| C(39)-Fe(1)-C(41) | 68.54(13)  |
| C(45)-Fe(1)-C(41) | 110.55(13) |
| C(46)-Fe(1)-C(41) | 138.59(13) |
| C(43)-Fe(1)-C(40) | 177.83(12) |
| C(42)-Fe(1)-C(40) | 68.47(12)  |
| C(38)-Fe(1)-C(40) | 68.90(11)  |
| C(47)-Fe(1)-C(40) | 140.30(13) |
| C(44)-Fe(1)-C(40) | 138.35(13) |
| C(39)-Fe(1)-C(40) | 40.77(12)  |
| C(45)-Fe(1)-C(40) | 112.44(13) |
| C(46)-Fe(1)-C(40) | 113.02(13) |
| C(41)-Fe(1)-C(40) | 40.14(13)  |
| C(79)-Fe(2)-C(78) | 110.11(10) |
| C(79)-Fe(2)-C(74) | 109.84(10) |
| C(78)-Fe(2)-C(74) | 41.62(10)  |
| C(79)-Fe(2)-C(83) | 41.55(11)  |
| C(78)-Fe(2)-C(83) | 138.60(11) |
| C(74)-Fe(2)-C(83) | 109.85(11) |
| C(79)-Fe(2)-C(80) | 41.70(10)  |
| C(78)-Fe(2)-C(80) | 111.09(12) |
| C(74)-Fe(2)-C(80) | 139.39(11) |
| C(83)-Fe(2)-C(80) | 69.49(12)  |
| C(79)-Fe(2)-C(75) | 139.02(10) |
| C(78)-Fe(2)-C(75) | 69.23(11)  |
| C(74)-Fe(2)-C(75) | 41.34(10)  |
| C(83)-Fe(2)-C(75) | 110.81(11) |
| C(80)-Fe(2)-C(75) | 179.17(11) |
| C(79)-Fe(2)-C(81) | 69.24(11)  |
| C(78)-Fe(2)-C(81) | 140.41(13) |
| C(74)-Fe(2)-C(81) | 177.86(13) |
| C(83)-Fe(2)-C(81) | 68.14(13)  |
| C(80)-Fe(2)-C(81) | 41.06(12)  |
| C(75)-Fe(2)-C(81) | 138.23(12) |
| C(79)-Fe(2)-C(77) | 138.87(11) |
| C(78)-Fe(2)-C(77) | 40.91(10)  |

|                      |            |
|----------------------|------------|
| C(74)-Fe(2)-C(77)    | 69.29(10)  |
| C(83)-Fe(2)-C(77)    | 179.09(12) |
| C(80)-Fe(2)-C(77)    | 111.34(12) |
| C(75)-Fe(2)-C(77)    | 68.36(11)  |
| C(81)-Fe(2)-C(77)    | 112.71(13) |
| C(79)-Fe(2)-C(82)    | 69.22(11)  |
| C(78)-Fe(2)-C(82)    | 179.18(11) |
| C(74)-Fe(2)-C(82)    | 138.00(13) |
| C(83)-Fe(2)-C(82)    | 40.58(12)  |
| C(80)-Fe(2)-C(82)    | 68.76(13)  |
| C(75)-Fe(2)-C(82)    | 110.93(12) |
| C(81)-Fe(2)-C(82)    | 39.96(14)  |
| C(77)-Fe(2)-C(82)    | 139.91(12) |
| C(79)-Fe(2)-C(76)    | 178.77(11) |
| C(78)-Fe(2)-C(76)    | 68.70(11)  |
| C(74)-Fe(2)-C(76)    | 69.10(10)  |
| C(83)-Fe(2)-C(76)    | 139.19(11) |
| C(80)-Fe(2)-C(76)    | 138.78(11) |
| C(75)-Fe(2)-C(76)    | 40.51(10)  |
| C(81)-Fe(2)-C(76)    | 111.84(11) |
| C(77)-Fe(2)-C(76)    | 40.37(11)  |
| C(82)-Fe(2)-C(76)    | 111.96(11) |
| C(2)-S(1)-Pd(1)      | 85.39(8)   |
| N(4)-C(2)-S(3)       | 123.48(18) |
| N(4)-C(2)-S(1)       | 124.58(18) |
| S(3)-C(2)-S(1)       | 111.88(14) |
| C(2)-S(3)-Pd(1)      | 86.13(8)   |
| C(2)-N(4)-C(11)      | 121.8(2)   |
| C(2)-N(4)-C(5)       | 120.9(2)   |
| C(11)-N(4)-C(5)      | 116.9(2)   |
| N(4)-C(5)-C(6)       | 113.40(19) |
| N(7)-C(6)-C(5)       | 113.4(2)   |
| C(8)-N(7)-C(6)       | 121.32(19) |
| C(8)-N(7)-C(18)      | 119.6(2)   |
| C(6)-N(7)-C(18)      | 118.78(19) |
| N(7)-C(8)-S(10)      | 124.26(18) |
| N(7)-C(8)-S(9)       | 123.58(18) |
| S(10)-C(8)-S(9)      | 112.15(13) |
| C(8)-S(9)-Pd(2)      | 86.04(8)   |
| C(8)-S(10)-Pd(2)     | 86.67(8)   |
| N(4)-C(11)-C(12)     | 112.5(2)   |
| C(13)-C(12)-C(17)    | 118.6(3)   |
| C(13)-C(12)-C(11)    | 121.7(3)   |
| C(17)-C(12)-C(11)    | 119.5(3)   |
| C(12)-C(13)-C(14)    | 120.5(3)   |
| C(15)-C(14)-C(13)    | 120.3(4)   |
| C(14)-C(15)-C(16)    | 119.4(3)   |
| C(15)-C(16)-C(17)    | 120.8(4)   |
| C(16)-C(17)-C(12)    | 120.2(3)   |
| N(7)-C(18)-C(19)     | 112.2(2)   |
| N(7)-C(18)-C(19')    | 112.9(7)   |
| C(20)-C(19)-C(24)    | 120.0      |
| C(20)-C(19)-C(18)    | 120.1(2)   |
| C(24)-C(19)-C(18)    | 119.9(2)   |
| C(21)-C(20)-C(19)    | 120.0      |
| C(20)-C(21)-C(22)    | 120.0      |
| C(23)-C(22)-C(21)    | 120.0      |
| C(22)-C(23)-C(24)    | 120.0      |
| C(23)-C(24)-C(19)    | 120.0      |
| C(20')-C(19')-C(24') | 120.0      |

|                      |            |
|----------------------|------------|
| C(20')-C(19')-C(18)  | 124.8(11)  |
| C(24')-C(19')-C(18)  | 115.0(11)  |
| C(21')-C(20')-C(19') | 120.0      |
| C(20')-C(21')-C(22') | 120.0      |
| C(23')-C(22')-C(21') | 120.0      |
| C(22')-C(23')-C(24') | 120.0      |
| C(23')-C(24')-C(19') | 120.0      |
| C(38)-P(25)-C(26)    | 107.06(19) |
| C(38)-P(25)-C(32)    | 101.90(11) |
| C(26)-P(25)-C(32)    | 106.25(18) |
| C(38)-P(25)-C(26')   | 102.6(3)   |
| C(32)-P(25)-C(26')   | 108.1(3)   |
| C(38)-P(25)-Pd(1)    | 121.79(8)  |
| C(26)-P(25)-Pd(1)    | 103.55(15) |
| C(32)-P(25)-Pd(1)    | 115.26(8)  |
| C(26')-P(25)-Pd(1)   | 106.0(3)   |
| C(27)-C(26)-C(31)    | 120.0      |
| C(27)-C(26)-P(25)    | 117.5(3)   |
| C(31)-C(26)-P(25)    | 122.2(3)   |
| C(26)-C(27)-C(28)    | 120.0      |
| C(27)-C(28)-C(29)    | 120.0      |
| C(30)-C(29)-C(28)    | 120.0      |
| C(31)-C(30)-C(29)    | 120.0      |
| C(30)-C(31)-C(26)    | 120.0      |
| C(27')-C(26')-C(31') | 120.0      |
| C(27')-C(26')-P(25)  | 118.5(6)   |
| C(31')-C(26')-P(25)  | 121.2(6)   |
| C(26')-C(27')-C(28') | 120.0      |
| C(27')-C(28')-C(29') | 120.0      |
| C(30')-C(29')-C(28') | 120.0      |
| C(31')-C(30')-C(29') | 120.0      |
| C(30')-C(31')-C(26') | 120.0      |
| C(37)-C(32)-C(33)    | 118.7(2)   |
| C(37)-C(32)-P(25)    | 121.3(2)   |
| C(33)-C(32)-P(25)    | 120.0(2)   |
| C(34)-C(33)-C(32)    | 120.4(3)   |
| C(35)-C(34)-C(33)    | 120.4(3)   |
| C(36)-C(35)-C(34)    | 119.5(3)   |
| C(35)-C(36)-C(37)    | 120.6(3)   |
| C(32)-C(37)-C(36)    | 120.4(3)   |
| C(39)-C(38)-C(42)    | 107.4(2)   |
| C(39)-C(38)-P(25)    | 127.7(2)   |
| C(42)-C(38)-P(25)    | 124.8(2)   |
| C(39)-C(38)-Fe(1)    | 70.30(15)  |
| C(42)-C(38)-Fe(1)    | 69.01(15)  |
| P(25)-C(38)-Fe(1)    | 126.62(13) |
| C(38)-C(39)-C(40)    | 107.7(3)   |
| C(38)-C(39)-Fe(1)    | 68.54(15)  |
| C(40)-C(39)-Fe(1)    | 70.26(17)  |
| C(41)-C(40)-C(39)    | 108.6(3)   |
| C(41)-C(40)-Fe(1)    | 69.69(17)  |
| C(39)-C(40)-Fe(1)    | 68.97(16)  |
| C(40)-C(41)-C(42)    | 108.1(3)   |
| C(40)-C(41)-Fe(1)    | 70.17(17)  |
| C(42)-C(41)-Fe(1)    | 68.11(15)  |
| C(41)-C(42)-C(38)    | 108.2(3)   |
| C(41)-C(42)-Fe(1)    | 71.01(16)  |
| C(38)-C(42)-Fe(1)    | 69.33(14)  |
| C(47)-C(43)-C(44)    | 107.0(3)   |
| C(47)-C(43)-P(48)    | 124.1(2)   |

|                   |            |
|-------------------|------------|
| C(44)-C(43)-P(48) | 128.8(2)   |
| C(47)-C(43)-Fe(1) | 69.73(15)  |
| C(44)-C(43)-Fe(1) | 69.45(16)  |
| P(48)-C(43)-Fe(1) | 123.16(13) |
| C(45)-C(44)-C(43) | 107.7(3)   |
| C(45)-C(44)-Fe(1) | 70.61(18)  |
| C(43)-C(44)-Fe(1) | 68.58(15)  |
| C(44)-C(45)-C(46) | 109.0(3)   |
| C(44)-C(45)-Fe(1) | 68.96(17)  |
| C(46)-C(45)-Fe(1) | 69.94(17)  |
| C(45)-C(46)-C(47) | 108.2(3)   |
| C(45)-C(46)-Fe(1) | 69.83(19)  |
| C(47)-C(46)-Fe(1) | 68.70(16)  |
| C(46)-C(47)-C(43) | 108.1(3)   |
| C(46)-C(47)-Fe(1) | 70.47(17)  |
| C(43)-C(47)-Fe(1) | 68.87(15)  |
| C(43)-P(48)-C(49) | 108.51(13) |
| C(43)-P(48)-C(55) | 105.07(13) |
| C(49)-P(48)-C(55) | 102.61(12) |
| C(43)-P(48)-Pd(1) | 115.35(9)  |
| C(49)-P(48)-Pd(1) | 111.63(9)  |
| C(55)-P(48)-Pd(1) | 112.71(9)  |
| C(50)-C(49)-C(54) | 118.9(3)   |
| C(50)-C(49)-P(48) | 120.1(2)   |
| C(54)-C(49)-P(48) | 120.9(2)   |
| C(51)-C(50)-C(49) | 120.4(3)   |
| C(52)-C(51)-C(50) | 120.0(3)   |
| C(53)-C(52)-C(51) | 120.3(3)   |
| C(52)-C(53)-C(54) | 120.4(3)   |
| C(53)-C(54)-C(49) | 119.9(3)   |
| C(60)-C(55)-C(56) | 119.0(3)   |
| C(60)-C(55)-P(48) | 121.8(2)   |
| C(56)-C(55)-P(48) | 119.1(2)   |
| C(57)-C(56)-C(55) | 120.7(3)   |
| C(56)-C(57)-C(58) | 119.8(4)   |
| C(59)-C(58)-C(57) | 120.0(3)   |
| C(58)-C(59)-C(60) | 121.2(4)   |
| C(55)-C(60)-C(59) | 119.4(3)   |
| C(74)-P(61)-C(62) | 102.93(11) |
| C(74)-P(61)-C(68) | 104.95(11) |
| C(62)-P(61)-C(68) | 104.43(13) |
| C(74)-P(61)-Pd(2) | 122.92(8)  |
| C(62)-P(61)-Pd(2) | 108.72(9)  |
| C(68)-P(61)-Pd(2) | 111.19(7)  |
| C(67)-C(62)-C(63) | 119.2(3)   |
| C(67)-C(62)-P(61) | 121.4(2)   |
| C(63)-C(62)-P(61) | 119.4(2)   |
| C(62)-C(63)-C(64) | 120.4(3)   |
| C(63)-C(64)-C(65) | 118.9(3)   |
| C(66)-C(65)-C(64) | 120.4(3)   |
| C(65)-C(66)-C(67) | 120.6(3)   |
| C(66)-C(67)-C(62) | 120.6(3)   |
| C(73)-C(68)-C(69) | 118.2(2)   |
| C(73)-C(68)-P(61) | 121.0(2)   |
| C(69)-C(68)-P(61) | 120.6(2)   |
| C(70)-C(69)-C(68) | 121.2(3)   |
| C(71)-C(70)-C(69) | 119.9(3)   |
| C(70)-C(71)-C(72) | 119.7(3)   |
| C(71)-C(72)-C(73) | 120.4(3)   |
| C(72)-C(73)-C(68) | 120.6(3)   |

|                   |            |
|-------------------|------------|
| C(75)-C(74)-C(78) | 106.8(2)   |
| C(75)-C(74)-P(61) | 125.21(19) |
| C(78)-C(74)-P(61) | 127.90(18) |
| C(75)-C(74)-Fe(2) | 69.92(15)  |
| C(78)-C(74)-Fe(2) | 68.89(14)  |
| P(61)-C(74)-Fe(2) | 123.65(12) |
| C(76)-C(75)-C(74) | 108.6(2)   |
| C(76)-C(75)-Fe(2) | 70.62(15)  |
| C(74)-C(75)-Fe(2) | 68.74(14)  |
| C(75)-C(76)-C(77) | 108.2(2)   |
| C(75)-C(76)-Fe(2) | 68.87(14)  |
| C(77)-C(76)-Fe(2) | 69.59(14)  |
| C(76)-C(77)-C(78) | 108.0(2)   |
| C(76)-C(77)-Fe(2) | 70.04(15)  |
| C(78)-C(77)-Fe(2) | 68.00(14)  |
| C(77)-C(78)-C(74) | 108.5(2)   |
| C(77)-C(78)-Fe(2) | 71.08(15)  |
| C(74)-C(78)-Fe(2) | 69.49(14)  |
| C(83)-C(79)-C(80) | 107.4(2)   |
| C(83)-C(79)-P(84) | 123.4(2)   |
| C(80)-C(79)-P(84) | 129.2(2)   |
| C(83)-C(79)-Fe(2) | 69.85(14)  |
| C(80)-C(79)-Fe(2) | 70.11(15)  |
| P(84)-C(79)-Fe(2) | 123.36(14) |
| C(81)-C(80)-C(79) | 106.9(3)   |
| C(81)-C(80)-Fe(2) | 70.24(17)  |
| C(79)-C(80)-Fe(2) | 68.19(15)  |
| C(82)-C(81)-C(80) | 109.0(3)   |
| C(82)-C(81)-Fe(2) | 70.29(18)  |
| C(80)-C(81)-Fe(2) | 68.70(16)  |
| C(81)-C(82)-C(83) | 108.1(3)   |
| C(81)-C(82)-Fe(2) | 69.75(18)  |
| C(83)-C(82)-Fe(2) | 68.31(16)  |
| C(82)-C(83)-C(79) | 108.5(3)   |
| C(82)-C(83)-Fe(2) | 71.11(17)  |
| C(79)-C(83)-Fe(2) | 68.60(15)  |
| C(79)-P(84)-C(91) | 103.61(12) |
| C(79)-P(84)-C(85) | 107.95(12) |
| C(91)-P(84)-C(85) | 102.67(12) |
| C(79)-P(84)-Pd(2) | 114.72(9)  |
| C(91)-P(84)-Pd(2) | 115.52(8)  |
| C(85)-P(84)-Pd(2) | 111.34(9)  |
| C(86)-C(85)-C(90) | 119.4(2)   |
| C(86)-C(85)-P(84) | 119.85(19) |
| C(90)-C(85)-P(84) | 120.7(2)   |
| C(85)-C(86)-C(87) | 120.2(3)   |
| C(86)-C(87)-C(88) | 119.4(3)   |
| C(89)-C(88)-C(87) | 120.3(3)   |
| C(90)-C(89)-C(88) | 120.4(3)   |
| C(89)-C(90)-C(85) | 120.3(3)   |
| C(96)-C(91)-C(92) | 118.6(3)   |
| C(96)-C(91)-P(84) | 122.3(2)   |
| C(92)-C(91)-P(84) | 119.1(2)   |
| C(93)-C(92)-C(91) | 120.5(3)   |
| C(94)-C(93)-C(92) | 119.6(3)   |
| C(95)-C(94)-C(93) | 120.3(3)   |
| C(94)-C(95)-C(96) | 120.5(4)   |
| C(91)-C(96)-C(95) | 120.4(3)   |

Table 7. Bond lengths [Å] and angles [°] for **6**.

|                   |            |
|-------------------|------------|
| Au(1)-P(13)       | 2.2483(10) |
| Au(1)-S(1)        | 2.3290(10) |
| Au(1)-S(3)        | 3.0756(10) |
| S(1)-C(2)         | 1.747(4)   |
| C(2)-N(4)         | 1.343(5)   |
| C(2)-S(3)         | 1.695(4)   |
| N(4)-C(6)         | 1.465(5)   |
| N(4)-C(5)         | 1.476(5)   |
| C(5)-C(5)#1       | 1.545(8)   |
| C(6)-C(7)         | 1.513(5)   |
| C(7)-C(12)        | 1.377(6)   |
| C(7)-C(8)         | 1.383(6)   |
| C(8)-C(9)         | 1.399(6)   |
| C(9)-C(10)        | 1.370(7)   |
| C(10)-C(11)       | 1.351(7)   |
| C(11)-C(12)       | 1.411(6)   |
| P(13)-C(26)       | 1.817(4)   |
| P(13)-C(14)       | 1.819(4)   |
| P(13)-C(20)       | 1.826(4)   |
| C(14)-C(19)       | 1.373(6)   |
| C(14)-C(15)       | 1.390(6)   |
| C(15)-C(16)       | 1.398(8)   |
| C(16)-C(17)       | 1.357(8)   |
| C(17)-C(18)       | 1.370(8)   |
| C(18)-C(19)       | 1.389(7)   |
| C(20)-C(21)       | 1.387(6)   |
| C(20)-C(25)       | 1.388(6)   |
| C(21)-C(22)       | 1.394(6)   |
| C(22)-C(23)       | 1.389(7)   |
| C(23)-C(24)       | 1.356(8)   |
| C(24)-C(25)       | 1.382(7)   |
| C(26)-C(31)       | 1.393(6)   |
| C(26)-C(27)       | 1.398(6)   |
| C(27)-C(28)       | 1.385(6)   |
| C(28)-C(29)       | 1.392(7)   |
| C(29)-C(30)       | 1.353(8)   |
| C(30)-C(31)       | 1.394(6)   |
| P(13)-Au(1)-S(1)  | 177.86(3)  |
| P(13)-Au(1)-S(3)  | 111.96(3)  |
| S(1)-Au(1)-S(3)   | 65.96(3)   |
| C(2)-S(1)-Au(1)   | 97.67(14)  |
| N(4)-C(2)-S(3)    | 121.6(3)   |
| N(4)-C(2)-S(1)    | 116.6(3)   |
| S(3)-C(2)-S(1)    | 121.8(2)   |
| C(2)-S(3)-Au(1)   | 74.60(13)  |
| C(2)-N(4)-C(6)    | 122.9(3)   |
| C(2)-N(4)-C(5)    | 120.8(3)   |
| C(6)-N(4)-C(5)    | 116.1(3)   |
| N(4)-C(5)-C(5)#1  | 108.9(4)   |
| N(4)-C(6)-C(7)    | 113.8(3)   |
| C(12)-C(7)-C(8)   | 119.3(4)   |
| C(12)-C(7)-C(6)   | 121.5(4)   |
| C(8)-C(7)-C(6)    | 119.2(4)   |
| C(7)-C(8)-C(9)    | 120.2(4)   |
| C(10)-C(9)-C(8)   | 120.5(4)   |
| C(11)-C(10)-C(9)  | 119.2(4)   |
| C(10)-C(11)-C(12) | 121.6(5)   |

|                   |            |
|-------------------|------------|
| C(7)-C(12)-C(11)  | 119.1(4)   |
| C(26)-P(13)-C(14) | 105.04(19) |
| C(26)-P(13)-C(20) | 105.52(18) |
| C(14)-P(13)-C(20) | 106.03(19) |
| C(26)-P(13)-Au(1) | 117.87(14) |
| C(14)-P(13)-Au(1) | 111.76(14) |
| C(20)-P(13)-Au(1) | 109.81(13) |
| C(19)-C(14)-C(15) | 119.1(4)   |
| C(19)-C(14)-P(13) | 122.8(3)   |
| C(15)-C(14)-P(13) | 118.1(4)   |
| C(14)-C(15)-C(16) | 119.3(5)   |
| C(17)-C(16)-C(15) | 121.3(6)   |
| C(16)-C(17)-C(18) | 119.2(5)   |
| C(17)-C(18)-C(19) | 120.7(5)   |
| C(14)-C(19)-C(18) | 120.4(5)   |
| C(21)-C(20)-C(25) | 119.8(4)   |
| C(21)-C(20)-P(13) | 122.6(3)   |
| C(25)-C(20)-P(13) | 117.6(3)   |
| C(20)-C(21)-C(22) | 119.6(4)   |
| C(23)-C(22)-C(21) | 119.8(5)   |
| C(24)-C(23)-C(22) | 120.1(4)   |
| C(23)-C(24)-C(25) | 121.1(5)   |
| C(24)-C(25)-C(20) | 119.6(5)   |
| C(31)-C(26)-C(27) | 119.7(4)   |
| C(31)-C(26)-P(13) | 118.7(3)   |
| C(27)-C(26)-P(13) | 121.5(3)   |
| C(28)-C(27)-C(26) | 119.9(4)   |
| C(27)-C(28)-C(29) | 119.9(5)   |
| C(30)-C(29)-C(28) | 120.2(4)   |
| C(29)-C(30)-C(31) | 121.4(5)   |
| C(26)-C(31)-C(30) | 119.0(4)   |

Symmetry transformations used to generate equivalent atoms:

#1 -x+1,-y+1,-z+1

Table 8. Bond lengths [Å] and angles [°] for 7.

|               |            |
|---------------|------------|
| Au(1)-P(13)   | 2.2440(6)  |
| Au(1)-S(1)    | 2.3233(5)  |
| Au(1)-S(3)    | 3.1196(5)  |
| Au(1')-P(13') | 2.248(13)  |
| Au(1')-S(3)   | 2.353(2)   |
| S(1)-C(2)     | 1.7436(19) |
| C(2)-N(4)     | 1.349(2)   |
| C(2)-S(3)     | 1.6922(19) |
| N(4)-C(5)     | 1.459(2)   |
| N(4)-C(12)    | 1.463(2)   |
| C(5)-C(6)     | 1.507(3)   |
| C(6)-C(7)     | 1.384(3)   |
| C(6)-C(11)    | 1.395(3)   |
| C(7)-C(8)     | 1.381(3)   |
| C(8)-C(9)     | 1.374(3)   |
| C(9)-C(10)    | 1.377(3)   |
| C(10)-C(11)   | 1.374(3)   |
| C(12)-C(12)#1 | 1.526(4)   |
| P(13)-C(16)   | 1.800(3)   |



|                      |            |
|----------------------|------------|
| P(13)-C(14)          | 1.801(3)   |
| P(13)-C(15)          | 1.803(3)   |
| P(13')-C(15')        | 1.792(13)  |
| P(13')-C(14')        | 1.795(13)  |
| P(13')-C(16')        | 1.811(13)  |
|                      |            |
| P(13)-Au(1)-S(1)     | 175.07(2)  |
| P(13')-Au(1')-S(3)   | 174.4(4)   |
| C(2)-S(1)-Au(1)      | 99.07(6)   |
| N(4)-C(2)-S(3)       | 121.49(14) |
| N(4)-C(2)-S(1)       | 117.39(14) |
| S(3)-C(2)-S(1)       | 121.12(11) |
| C(2)-S(3)-Au(1')     | 103.99(9)  |
| C(2)-S(3)-Au(1)      | 74.17(6)   |
| C(2)-N(4)-C(5)       | 124.33(16) |
| C(2)-N(4)-C(12)      | 121.46(16) |
| C(5)-N(4)-C(12)      | 114.20(15) |
| N(4)-C(5)-C(6)       | 113.85(15) |
| C(7)-C(6)-C(11)      | 117.92(19) |
| C(7)-C(6)-C(5)       | 123.38(17) |
| C(11)-C(6)-C(5)      | 118.68(17) |
| C(8)-C(7)-C(6)       | 120.71(19) |
| C(9)-C(8)-C(7)       | 120.6(2)   |
| C(8)-C(9)-C(10)      | 119.4(2)   |
| C(11)-C(10)-C(9)     | 120.2(2)   |
| C(10)-C(11)-C(6)     | 121.1(2)   |
| N(4)-C(12)-C(12)#1   | 110.41(18) |
| C(16)-P(13)-C(14)    | 104.64(17) |
| C(16)-P(13)-C(15)    | 104.49(12) |
| C(14)-P(13)-C(15)    | 105.49(15) |
| C(16)-P(13)-Au(1)    | 114.46(9)  |
| C(14)-P(13)-Au(1)    | 113.07(11) |
| C(15)-P(13)-Au(1)    | 113.73(10) |
| C(15')-P(13')-C(14') | 105.5(10)  |
| C(15')-P(13')-C(16') | 104.3(10)  |
| C(14')-P(13')-C(16') | 104.4(10)  |
| C(15')-P(13')-Au(1') | 114.6(9)   |
| C(14')-P(13')-Au(1') | 114.0(9)   |
| C(16')-P(13')-Au(1') | 112.9(9)   |

Symmetry transformations used to generate equivalent atoms:

#1 -x+1,-y+1,-z+1
